# Supplementary material
Source: publisher figshare collection journal article supplement (https://frontiersin.figshare.com/ndownloader/files/31878167)
Supplement: Supplementary file 1 [file 31878167]

## Supplementary Material

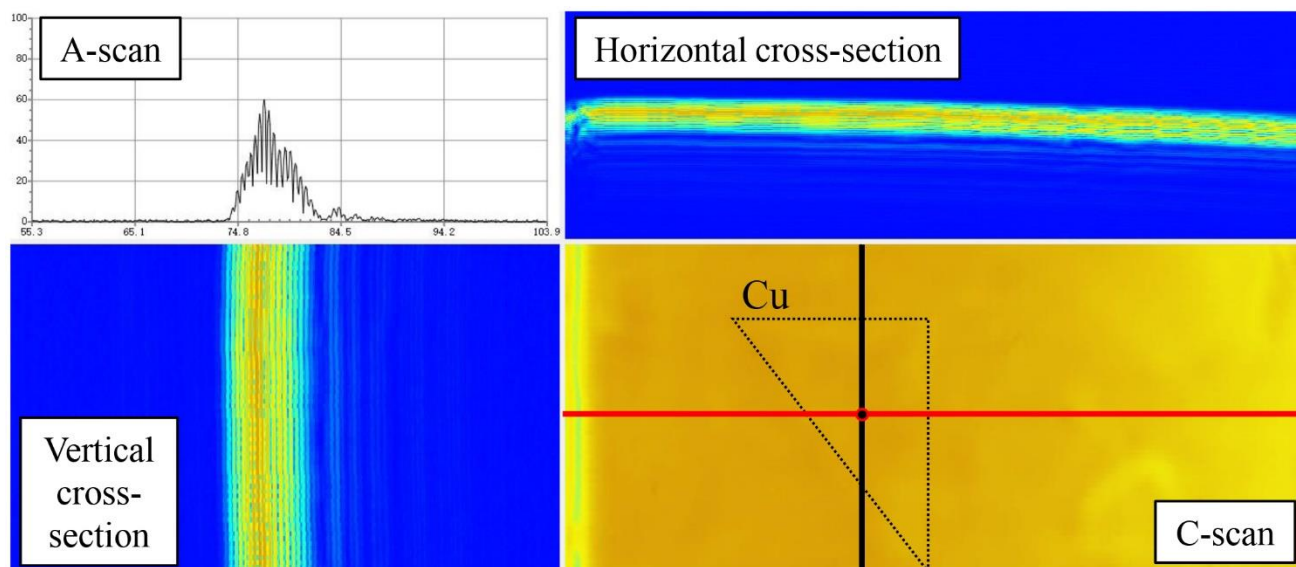

**Supplementary Figure S1.** Comprehensive reflection image for Cu foil on cathode surface

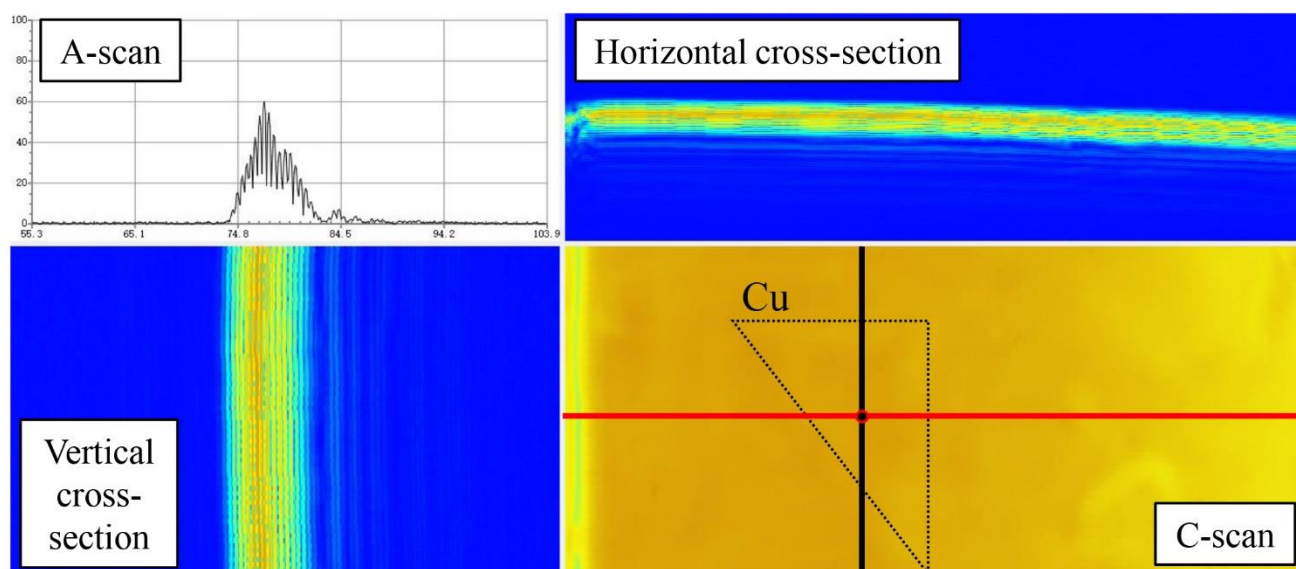

**Supplementary Figure S2.** Comprehensive reflection image for Al foil on cathode surface
